# Supplementary material for: Biglycan regulated colorectal cancer progress by modulating enteric neuron-derived IL-10 and abundance of Bacteroides thetaiotaomicron
Source: PubMed Central journal article supplement — iScience. 2023 Aug 2;26(9):107515. doi: 10.1016/j.isci.2023.107515 (PMC10469580; doi:10.1016/j.isci.2023.107515), 2023-08-02
Supplement: mmc1.pdf [file mmc1.pdf]

**Supplemental information**

**Biglycan regulated colorectal cancer progress**

**by modulating enteric neuron-derived**

**IL-10 and abundance of *Bacteroides thetaiotaomicron***

**Yuyu Xu, Fei Wang, Kai Mi, Xinyuan Wang, Danlei Wang, Qing Zhao, Jingjing Wang, Zhi Liu, Qingqing Zhang, Yang Liu, Xuemei Zhang, and Xingyin Liu**

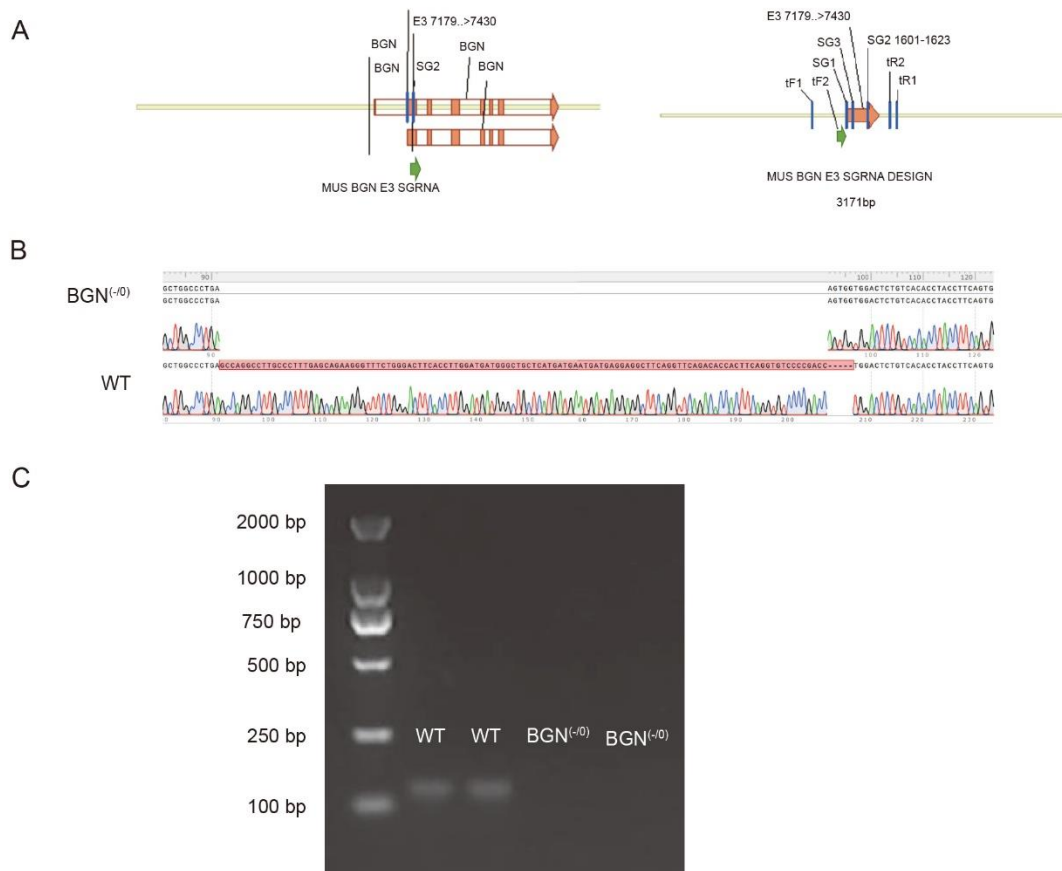

**Figure S1 The establishment of BGN deficiency mouse, related to Figure 1 and Figure 2.**

**A.** The establishment of BGN<sup>(-/-)</sup> mouse, by CRISPR/Cas9 technology.

**B.** The verification of BGN<sup>(-/-)</sup> mouse, by Sanger sequence

**C.** The verification of BGN<sup>(-/-)</sup> mouse, by RT-PCR.

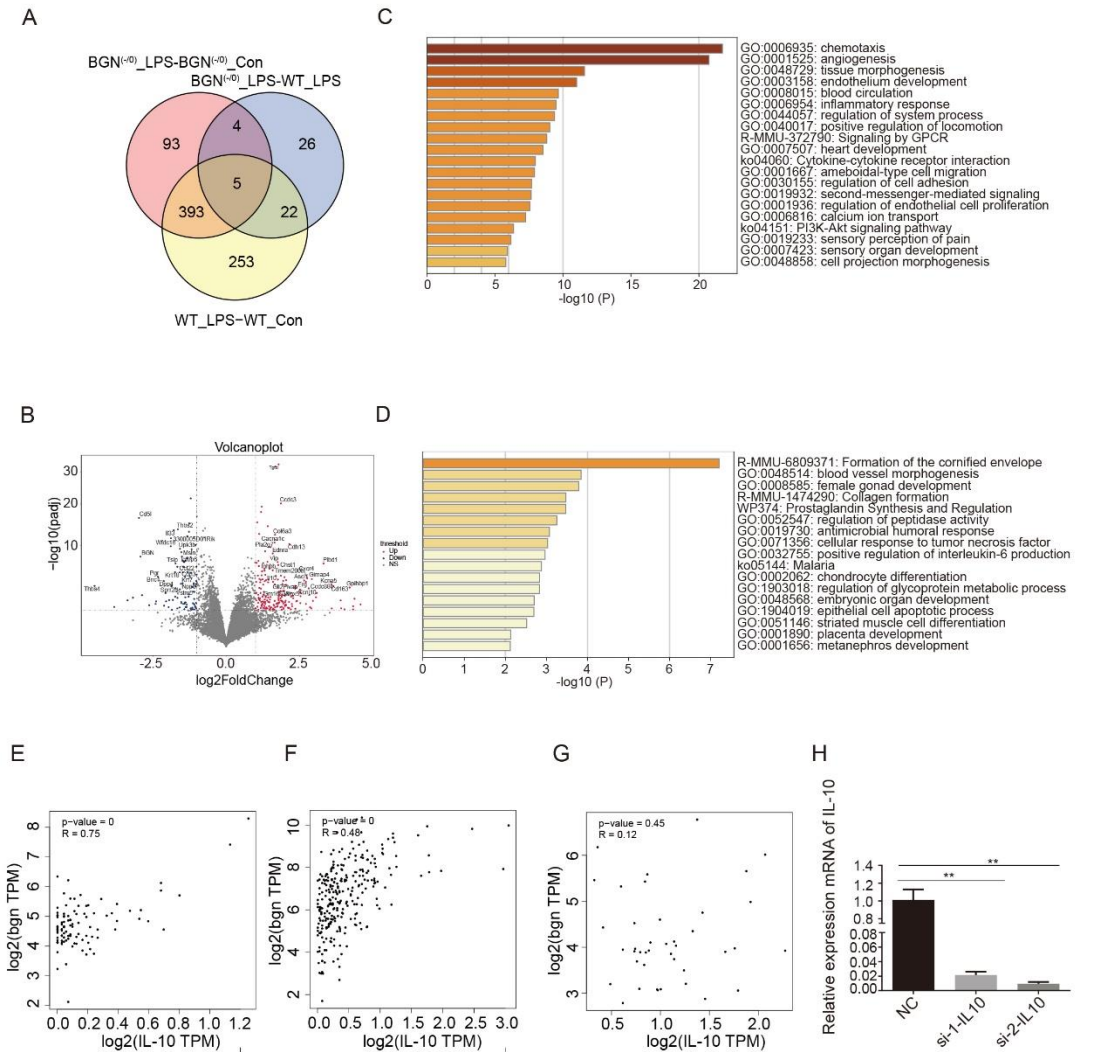

**Figure S2 RNA-seq analysis revealed that BGN regulated IL-10 expression in enteric neurons, related to Figure 3.**

- A.** Venn diagram showing the overlap of DEGs in three comparisons.
- B.** Volcano Plot showed the genes in BGN<sup>(-/0)</sup>\_LPS vs WT\_LPS enteric neurons.
- C.** GO enrichment analysis of upregulated genes in BGN<sup>(-/0)</sup>\_LPS vs WT\_LPS comparison.
- D.** GO enrichment analysis of downregulated genes in BGN<sup>(-/0)</sup>\_LPS vs WT\_LPS comparison.
- E.** IL-10 expression is highly correlated with BGN in brain cortex ( $p=0$ ,  $R=0.75$ ).
- F.** IL-10 expression has correlation with BGN in COAD tumor tissues ( $p=0$ ,  $R=0.48$ ).
- G.** IL-10 expression has no correlation with BGN in COAD normal tissue ( $p=0.45$ ,

R=0.12).

**H.** Knockdown of IL-10 using siRNA in enteric neurons from BGN<sup>(-/0)</sup> mice, detected by RT-qPCR.

Data are representative or cumulative results of at least two independent experiments (A-D and H). Data are presented as mean  $\pm$  S.E.M. \*p < 0.05, \*\*p < 0.01, \*\*\*p < 0.001, and n.s. indicates not significant (p > 0.05).

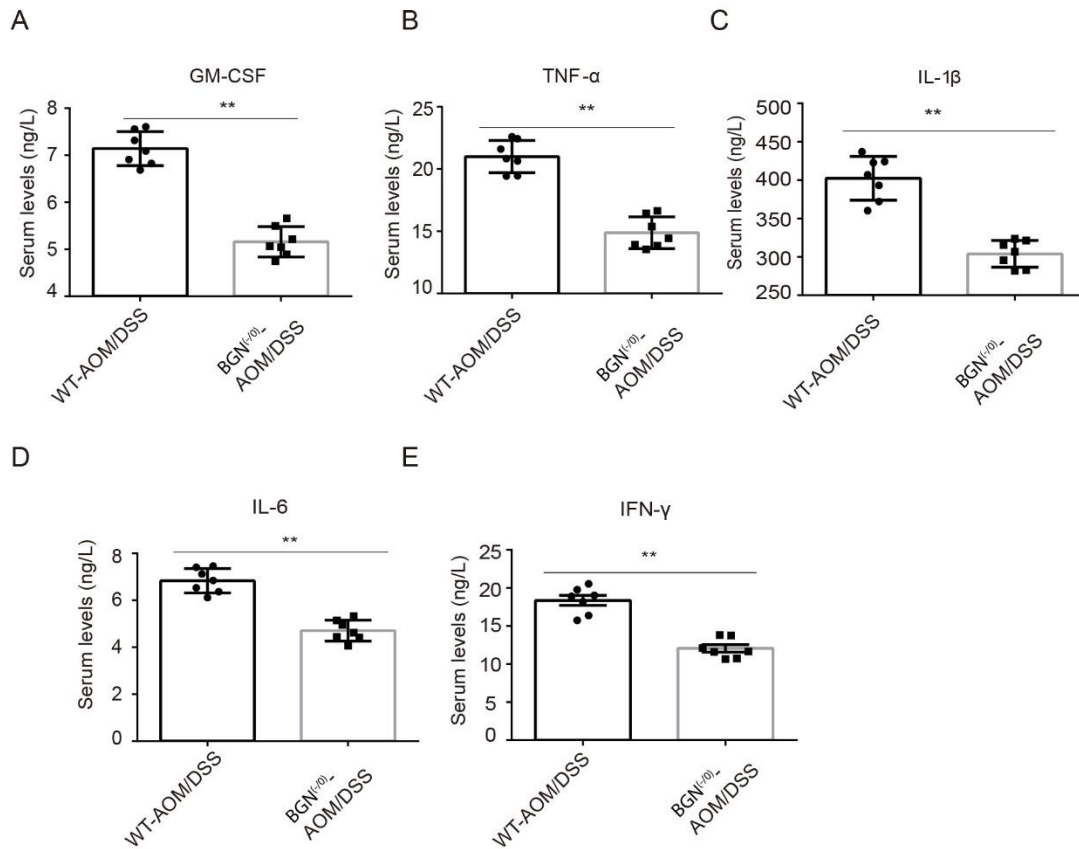

**Figure S3 BGN deficiency reduced cytokine expression in CAC mice, related to Figure 3.**

**A.** BGN deficiency reduced the level of GM-CSF in serum of CAC mice, as detected by ELISA assay (n=7 mice/group).

**B.** BGN deficiency reduced the level of TNF-α in serum of CAC mice, as detected by ELISA assay (n=7 mice/group).

**C.** BGN deficiency reduced the level of IL-1β in serum of CAC mice, as detected by ELISA assay (n=7 mice/group).

**D.** BGN deficiency reduced the level of IL-6 in serum of CAC mice, as detected by ELISA assay (n=7 mice/group).

**E.** BGN deficiency reduced the level of IFN-γ in serum of CAC mice, as detected by ELISA assay (n=7 mice/group).

Data are representative or cumulative results of at least two independent experiments (A-E). Data are presented as mean ± S.E.M. \*\*p < 0.01.

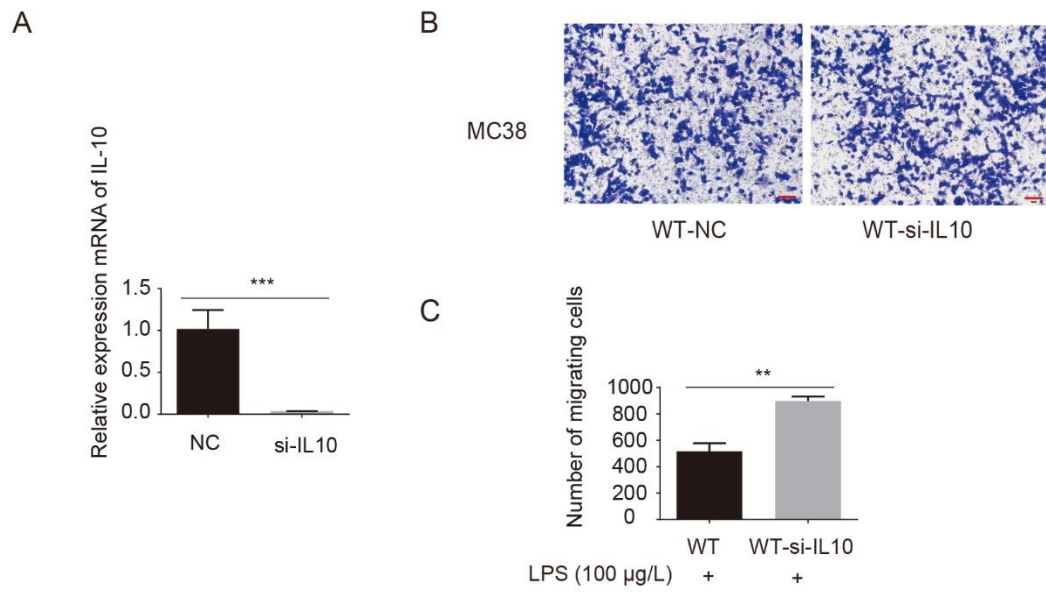

**Figure S4 Knockdown of IL-10 increased the migration of cancer cells, related to Figure 3.**

**A.** Knockdown of IL-10 using siRNA in enteric neurons from WT mice, detected by RT-qPCR (n=3 biological replicates/ group).

**B.** The number of MC38 cells migration was increased in co-culture with IL-10 knockdown of WT mice enteric neurons with LPS (100 µg/L) (n=3 biological replicates/group).

Data are presented as mean  $\pm$  S.E.M. \*\*p < 0.01, \*\*\*p < 0.001

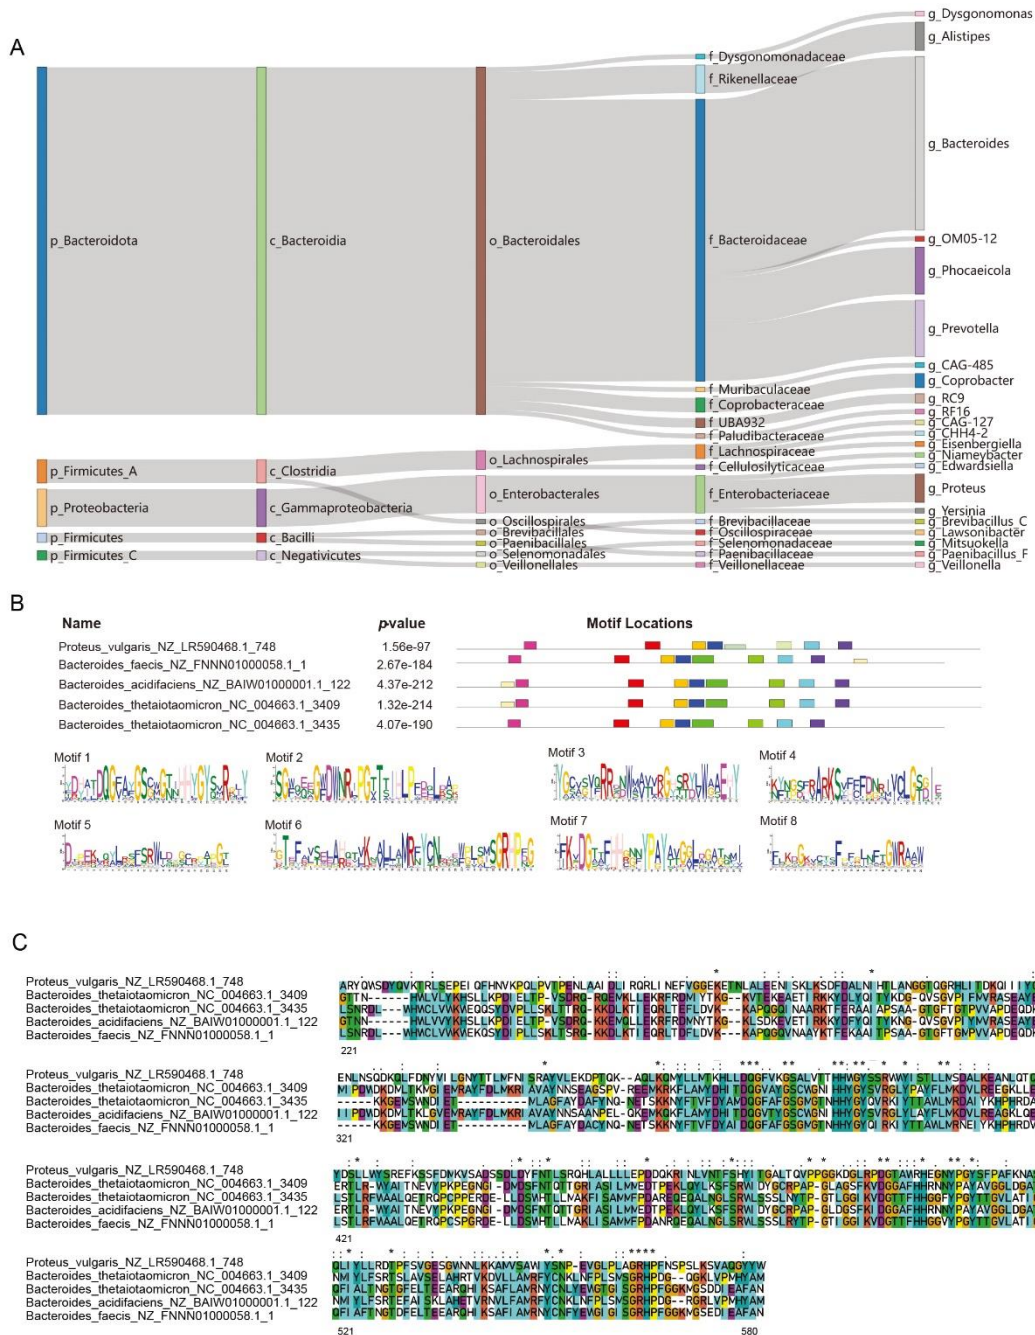

**Figure S5 Bioinformatic analysis showed *B. thetaiotaomicron* encode conserved ChABC with that of *Proteus vulgaris*, related to Figure 4.**

**A.** BIO-Sankey Network for ChABC-encoding bacteria. The *Bacteroides* genus occupies a large proportion in the network.

**B.** Motif pattern on five ChABC sequences from *Proteus vulgaris* and *B. thetaiotaomicron*, etc.

**C.** Protein sequence alignment analysis on five ChABC sequences from *Proteus vulgaris* and *B. thetaiotaomicron*, etc.



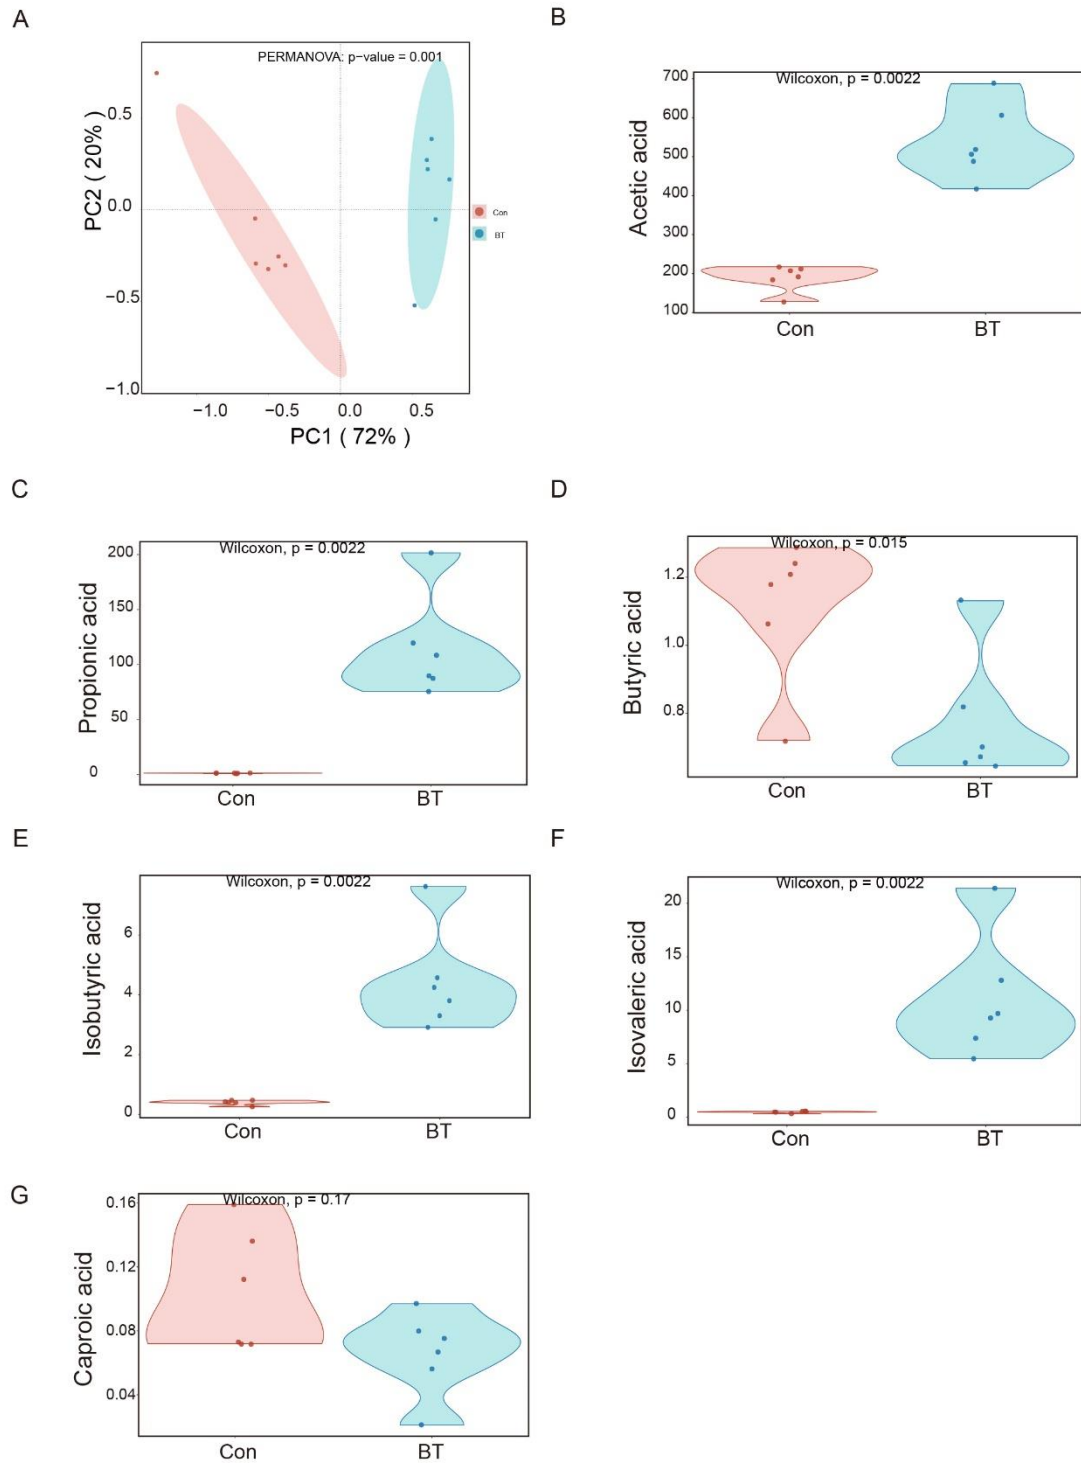

**Figure S6 B.** *thetaiotaomicron* supernatant enriched SCFAs, related to Figure 5.

**A.** The PcoA analysis showed the level of SCFAs were clearly distinctive from each other in the two groups.

**B and C.** Acetic acid and propionic acid were in higher level in the supernatant of *B. thetaiotaomicron* medium than that in control medium.

**D.** The level of butyric acid was lower in the supernatant of *B. thetaiotaomicron* medium than that in control medium.

**E and F.** Isobutyric acid and Isovaleric acid were in higher level in the supernatant of *B. thetaiotaomicron* medium than that in control medium.

**G.** No significant difference in the level of Caproic acid between the two groups.

Data are presented as mean  $\pm$  SD. p-value  $<$  0.05 was considered statistically significant, p-value  $>$  0.05 was considered statistically significant.

**Table S1 Primer used in RT-qPCR and RT-PCR**

|       |         |                             |
|-------|---------|-----------------------------|
| 18S   | Forward | TTGACGGAAGGGCACCACCAG       |
| 18S   | Reverse | GCACCACCACCCACGGAATCG       |
| IL-10 | Forward | CTGGACAACATACTGCTAACCGAC    |
| IL-10 | Reverse | ATTCATTCATGGCCTTG TAGACACC  |
| BGN   | Forward | AGAGAGAACCCTAGCTACTACTGCTGG |
| BGN   | Reverse | CCCATCTCACAGGGTAGCAAATGT    |

The list of primers for qPCR, related to Figure S1, Figure S2 and Figure S4.

**Table S2 The list of taxa can encode the four enzymes (3.2.1.180, 4.2.2.20, 4.2.2.21, 4.2.2.5) and belongs to Bacteroides genus.**

| Genus       | Species                    | Annotation                                                                                                                 |
|-------------|----------------------------|----------------------------------------------------------------------------------------------------------------------------|
| Bacteroides | Bacteroides ndongoniae     | d__Bacteria;p__Bacteroidota;c__Bacteroidia;o__Bacteroidales;f__Bacteroidaceae;g__Bacteroides;s__Bacteroides ndongoniae     |
| Bacteroides | Bacteroides sp003545565    | d__Bacteria;p__Bacteroidota;c__Bacteroidia;o__Bacteroidales;f__Bacteroidaceae;g__Bacteroides;s__Bacteroides sp003545565    |
| Bacteroides | Bacteroides cellulolyticus | d__Bacteria;p__Bacteroidota;c__Bacteroidia;o__Bacteroidales;f__Bacteroidaceae;g__Bacteroides;s__Bacteroides cellulolyticus |
| Bacteroides | Bacteroides timonensis     | d__Bacteria;p__Bacteroidota;c__Bacteroidia;o__Bacteroidales;f__Bacteroidaceae;g__Bacteroides;s__Bacteroides timonensis     |
| Bacteroides | Bacteroides sp900556625    | d__Bacteria;p__Bacteroidota;c__Bacteroidia;o__Bacteroidales;f__Bacteroidaceae;g__Bacteroides;s__Bacteroides sp900556625    |
| Bacteroides | Bacteroides sp012113595    | d__Bacteria;p__Bacteroidota;c__Bacteroidia;o__Bacteroidales;f__Bacteroidaceae;g__Bacteroides;s__Bacteroides sp012113595    |
| Bacteroides | Bacteroides congonensis    | d__Bacteria;p__Bacteroidota;c__Bacteroidia;o__Bacteroidales;f__Bacteroidaceae;g__Bacteroides;s__Bacteroides congonensis    |
| Bacteroides | Bacteroides sp902362375    | d__Bacteria;p__Bacteroidota;c__Bacteroidia;o__Bacteroidales;f__Bacteroidaceae;g__Bacteroides;s__Bacteroides sp902362375    |
| Bacteroides | Bacteroides salyersiae     | d__Bacteria;p__Bacteroidota;c__Bacteroidia;o__Bacteroidales;f__Bacteroidaceae;g__Bacteroides;s__Bacteroides salyersiae     |
| Bacteroides | Bacteroides acidifaciens_A | d__Bacteria;p__Bacteroidota;c__Bacteroidia;o__Bacteroidales;f__Bacteroidaceae;g__Bacteroides;s__Bacteroides acidifaciens_A |
| Bacteroides | Bacteroides sp900765785    | d__Bacteria;p__Bacteroidota;c__Bacteroidia;o__Bacteroidales;f__Bacteroidaceae;g__Bacteroides;s__Bacteroides sp900765785    |
| Bacteroides | Bacteroides sp902388495    | d__Bacteria;p__Bacteroidota;c__Bacteroidia;o__Bacteroidales;f__Bacteroidaceae;g__Bacteroides;s__Bacteroides sp902388495    |
| Bacteroides | Bacteroides sp900066265    | d__Bacteria;p__Bacteroidota;c__Bacteroidia;o__Bacteroidales;f__Bacteroidaceae;g__Bacteroides;s__Bacteroides sp900066265    |
| Bacteroides | Bacteroides sp900556215    | d__Bacteria;p__Bacteroidota;c__Bacteroidia;o__Bacteroidales;f__Bacteroidaceae;g__Bacteroides;s__Bacteroides sp900556215    |
| Bacteroides | Bacteroides sp900555635    | d__Bacteria;p__Bacteroidota;c__Bacteroidia;o__Bacteroidales;f__Bacteroidaceae;g__Bacteroides;s__Bacteroides sp900555635    |
| Bacteroides | Bacteroides sp900761785    | d__Bacteria;p__Bacteroidota;c__Bacteroidia;o__Bacteroidales;f__Bacteroidaceae;g__Bacteroides;s__Bacteroides sp900761785    |
| Bacteroides | Bacteroides sp900552405    | d__Bacteria;p__Bacteroidota;c__Bacteroidia;o__Bacteroidales;f__Bacteroidaceae;g__Bacteroides;s__Bacteroides sp900552405    |
| Bacteroides | Bacteroides stercorisoris  | d__Bacteria;p__Bacteroidota;c__Bacteroidia;o__Bacteroidales;f__Bacteroidaceae;g__Bacteroides;s__Bacteroides stercorisoris  |
| Bacteroides | Bacteroides sp007097645    | d__Bacteria;p__Bacteroidota;c__Bacteroidia;o__Bacteroidales;f__Bacteroidaceae;g__Bacteroides;s__Bacteroides sp007097645    |
| Bacteroides | Bacteroides oleiciplenus   | d__Bacteria;p__Bacteroidota;c__Bacteroidia;o__Bacteroidales;f__Bacteroidaceae;g__Bacteroides;s__Bacteroides oleiciplenus   |
| Bacteroides | Bacteroides intestinalis   | d__Bacteria;p__Bacteroidota;c__Bacteroidia;o__Bacteroidales;f__Bacteroidaceae;g__Bacteroides;s__Bacteroides intestinalis   |
| Bacteroides | Bacteroides sp900755095    | d__Bacteria;p__Bacteroidota;c__Bacteroidia;o__Bacteroidales;f__Bacteroidaceae;g__Bacteroides;s__Bacteroides sp900755095    |
| Bacteroides | Bacteroides rodentium      | d__Bacteria;p__Bacteroidota;c__Bacteroidia;o__Bacteroidales;f__Bacteroidaceae;g__Bacteroides;s__Bacteroides rodentium      |

|             |                              |                                                                                                                              |
|-------------|------------------------------|------------------------------------------------------------------------------------------------------------------------------|
| Bacteroides | Bacteroides intestinalis_A   | d__Bacteria;p__Bacteroidota;c__Bacteroidia;o__Bacteroidales;f__Bacteroidaceae;g__Bacteroides;s__Bacteroides intestinalis_A   |
| Bacteroides | Bacteroides sp900557355      | d__Bacteria;p__Bacteroidota;c__Bacteroidia;o__Bacteroidales;f__Bacteroidaceae;g__Bacteroides;s__Bacteroides sp900557355      |
| Bacteroides | Bacteroides clarus           | d__Bacteria;p__Bacteroidota;c__Bacteroidia;o__Bacteroidales;f__Bacteroidaceae;g__Bacteroides;s__Bacteroides clarus           |
| Bacteroides | Bacteroides thetaiotaomicron | d__Bacteria;p__Bacteroidota;c__Bacteroidia;o__Bacteroidales;f__Bacteroidaceae;g__Bacteroides;s__Bacteroides thetaiotaomicron |

The list of taxa can encode the four enzymes (3.2.1.180, 4.2.2.20, 4.2.2.21, 4.2.2.5) and belongs to Bacteroides genus, related to Figure 4.
